# Supplementary material
Source: PubMed Central journal article supplement (PMC7573257)
Supplement: supp_RA120.014994_161795_2_supp_571901_q151rg.pdf [file supp_RA120.014994_161795_2_supp_571901_q151rg.pdf]

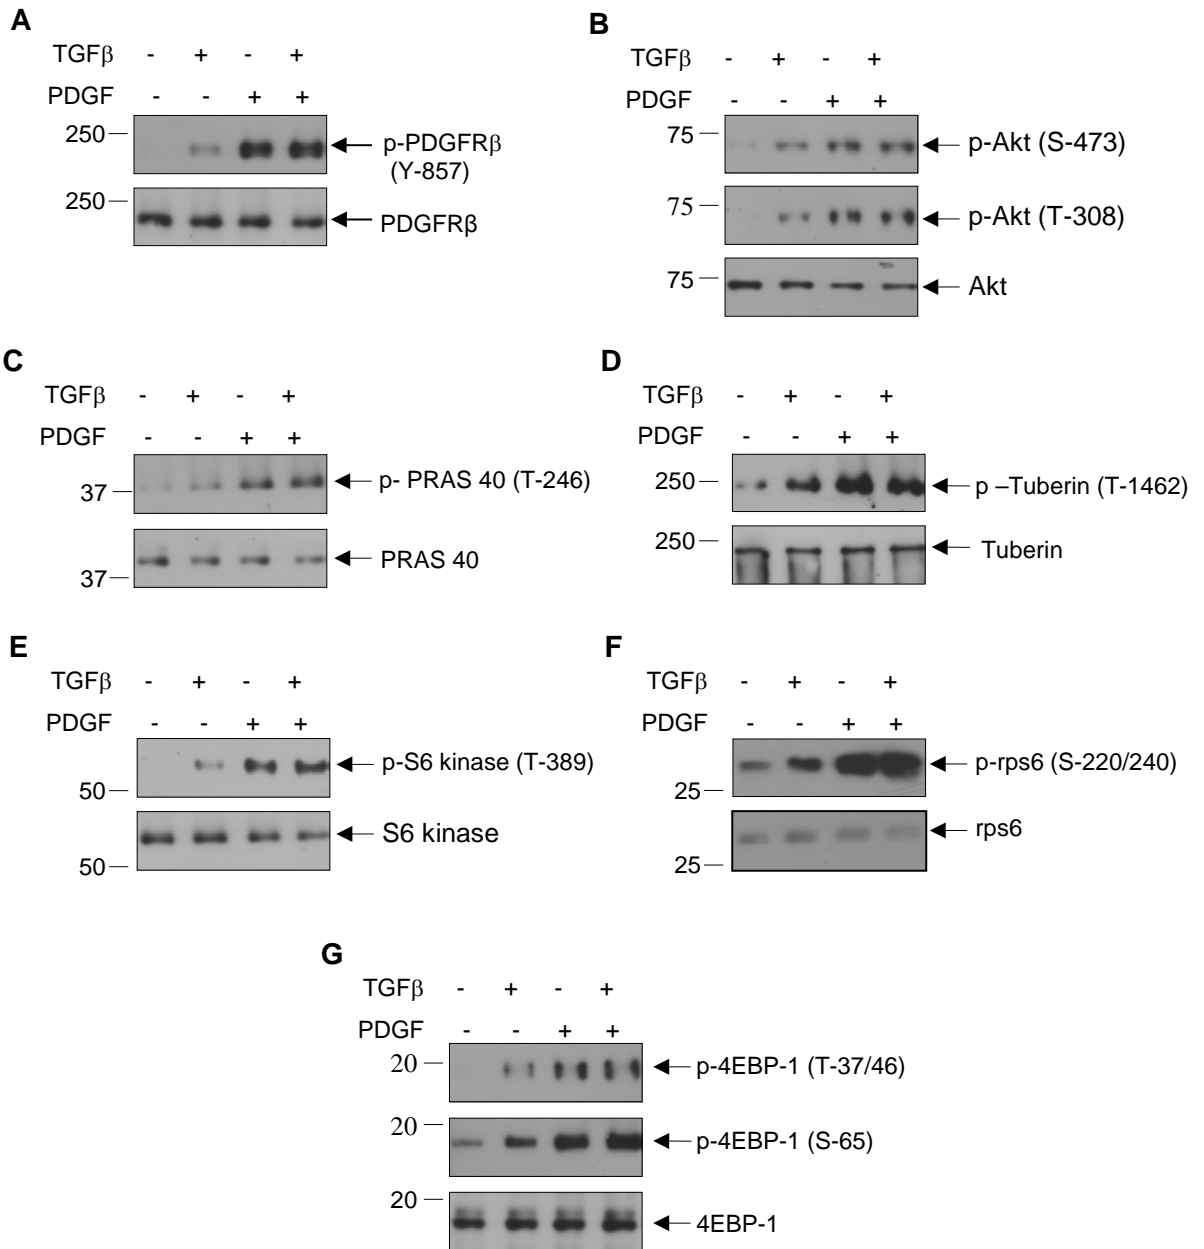

**Figure S1.** PDGF significantly increases Akt/mTORC1 activity compared to TGFβ alone. Mesangial cells were incubated with TGFβ (2 ng/ml) or PDGF (20 ng/ml) for 2 hours. The cell lysates were immunoblotted with indicated antibodies.

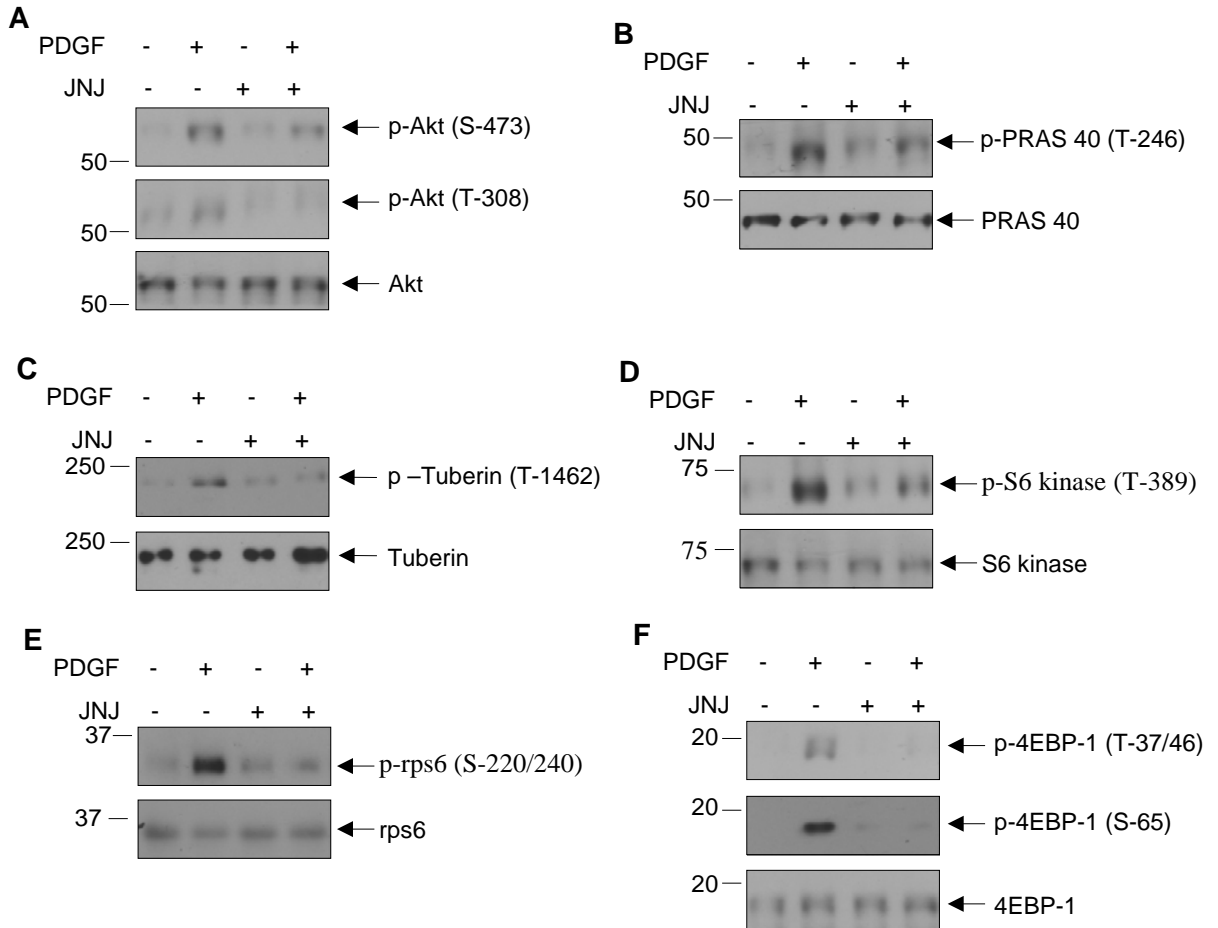

**Figure S2.** Inhibition of PDGFR $\beta$  blocks Akt/mTORC1 activity. Mesangial cells were treated with 0.1  $\mu$ M JNJ for one hour prior to incubation with PDGF (20 ng/ml) for 2 hours. The cell lysates were immunoblotted with indicated antibodies.

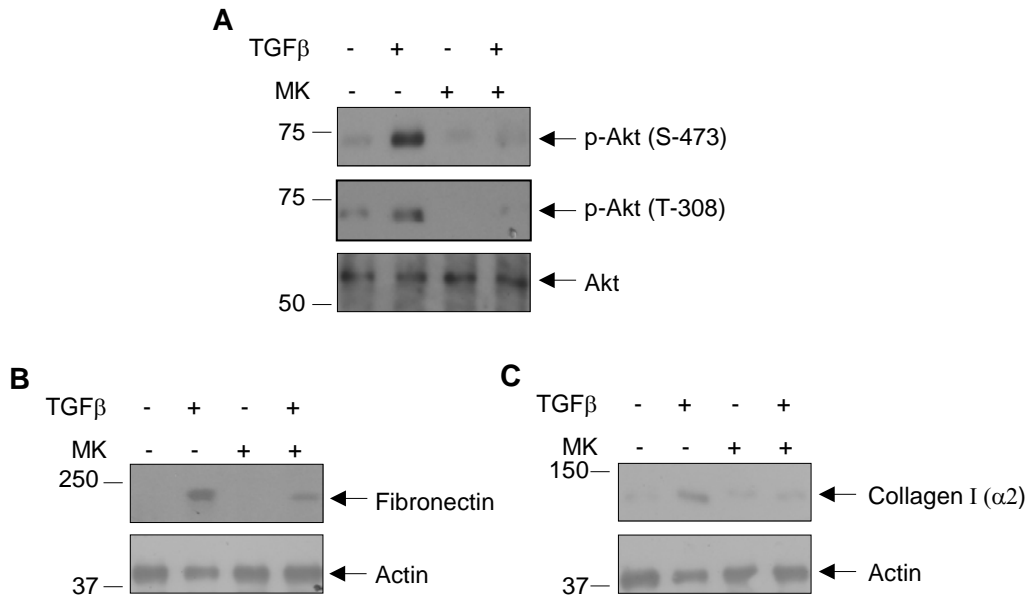

**Figure S3.** Inhibition of Akt blocks TGF $\beta$ -induced fibronectin and collagen I ( $\alpha$ 2) expression. Mesangial cells were treated with 1  $\mu$ M MK 2206 (MK) prior to incubation with TGF $\beta$ . The cell lysates were immunoblotted with indicated antibodies.

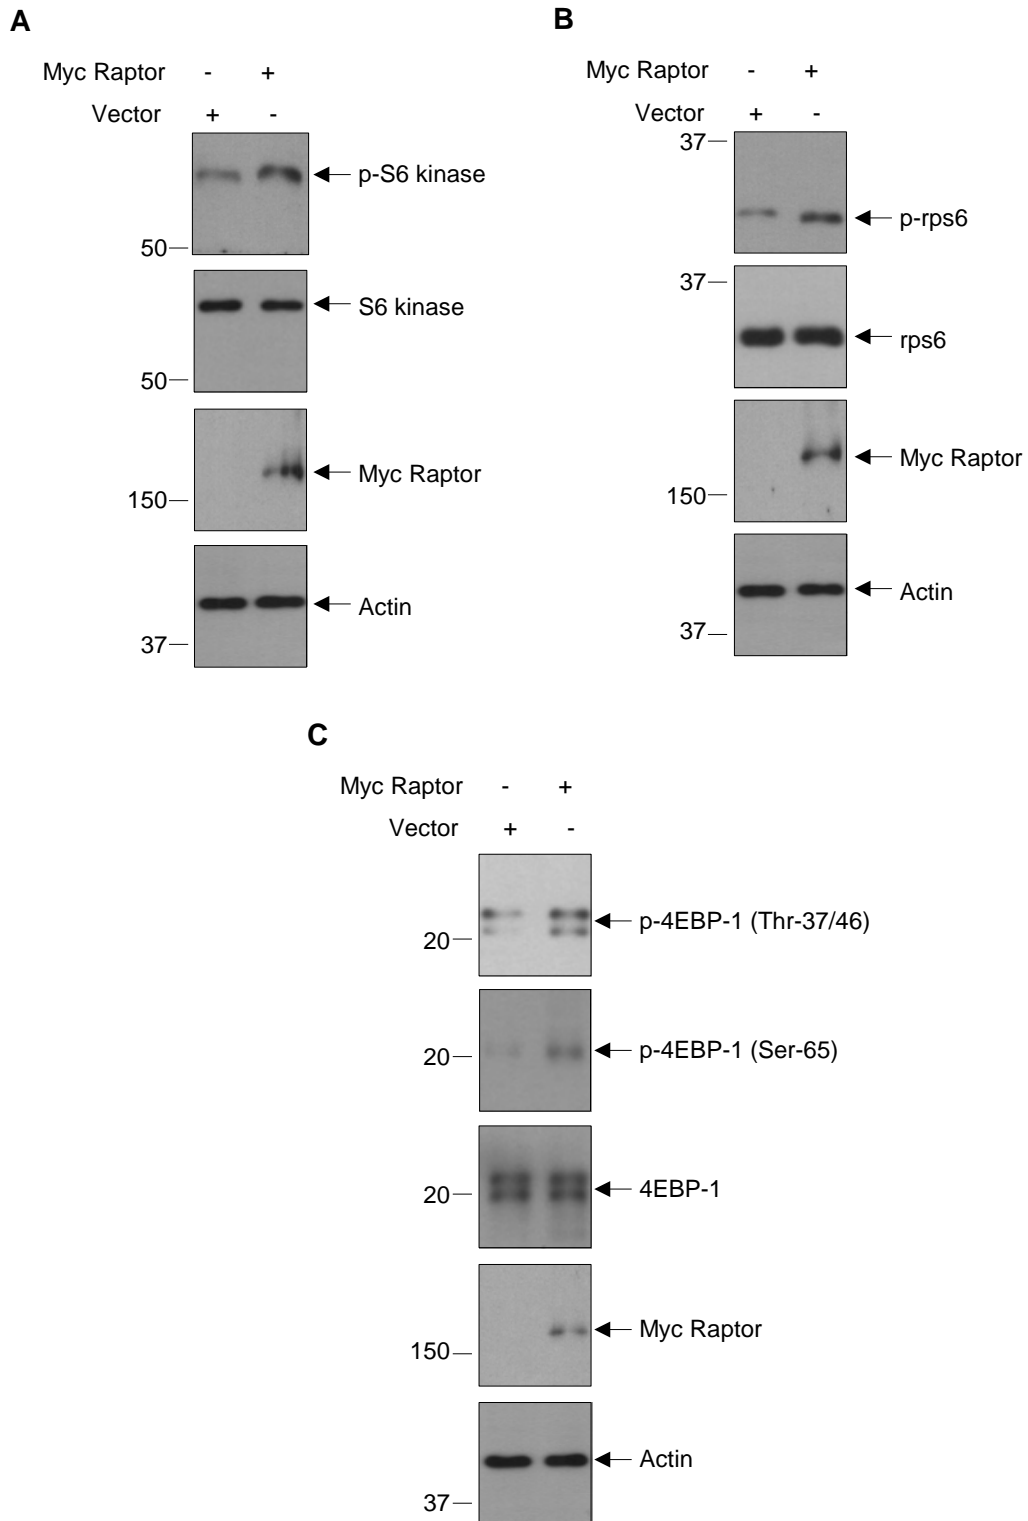

**Figure S4.** Expression of Raptor increases mTORC1 activity. Mesangial cells were transfected with Myc-tagged raptor or vector alone as indicated. The cell lysates were immunoblotted with indicated antibodies.

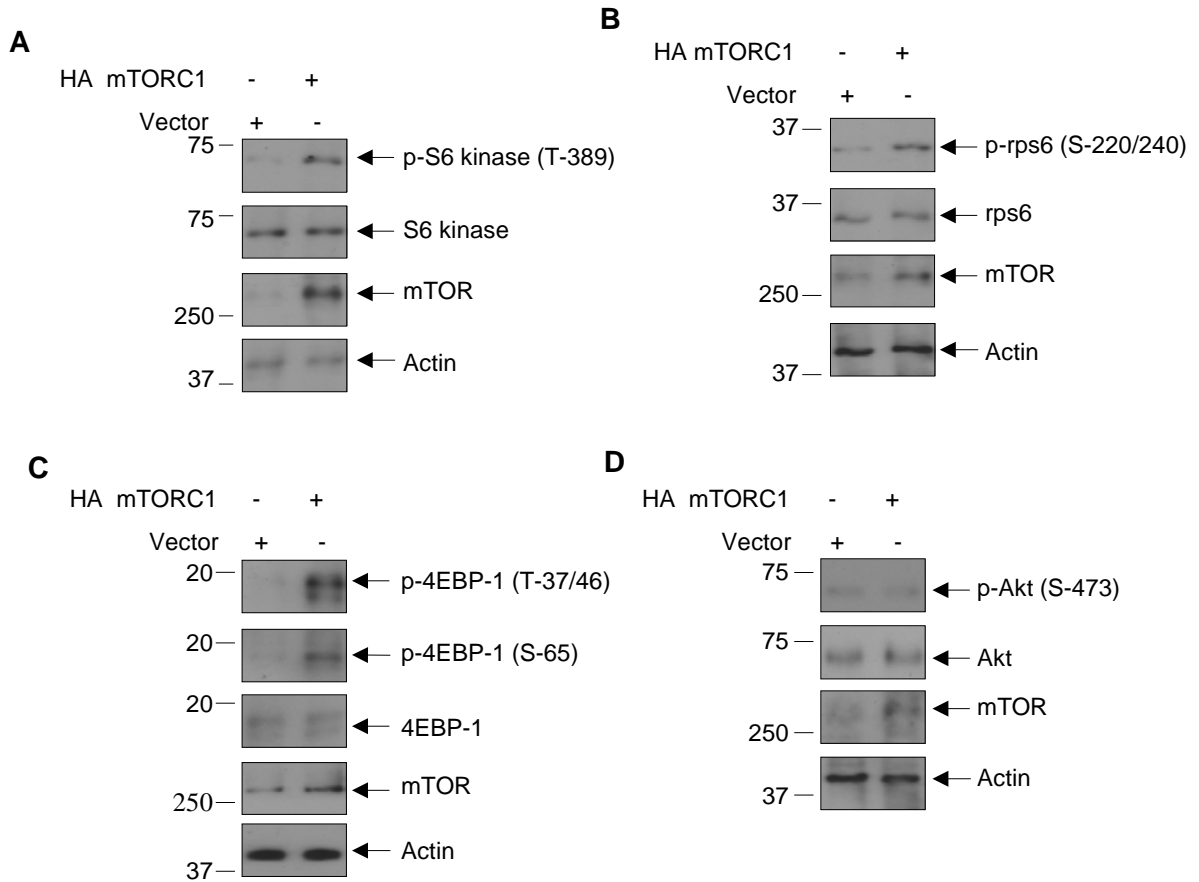

**Figure S5.** Expression of hyperactive (HA) mTOR mutant increases mTORC1 activity in the absence of mTORC2 activity. Mesangial cells were transfected with indicated plasmids. The cell lysates were immunoblotted with phospho-S6 kinase, phospho-rps6, phospho-4EBP-1 as indication of mTORC1 activity (panels A – C) and with phospho-Akt (Ser-473) as indication of mTORC2 activity (panel D).

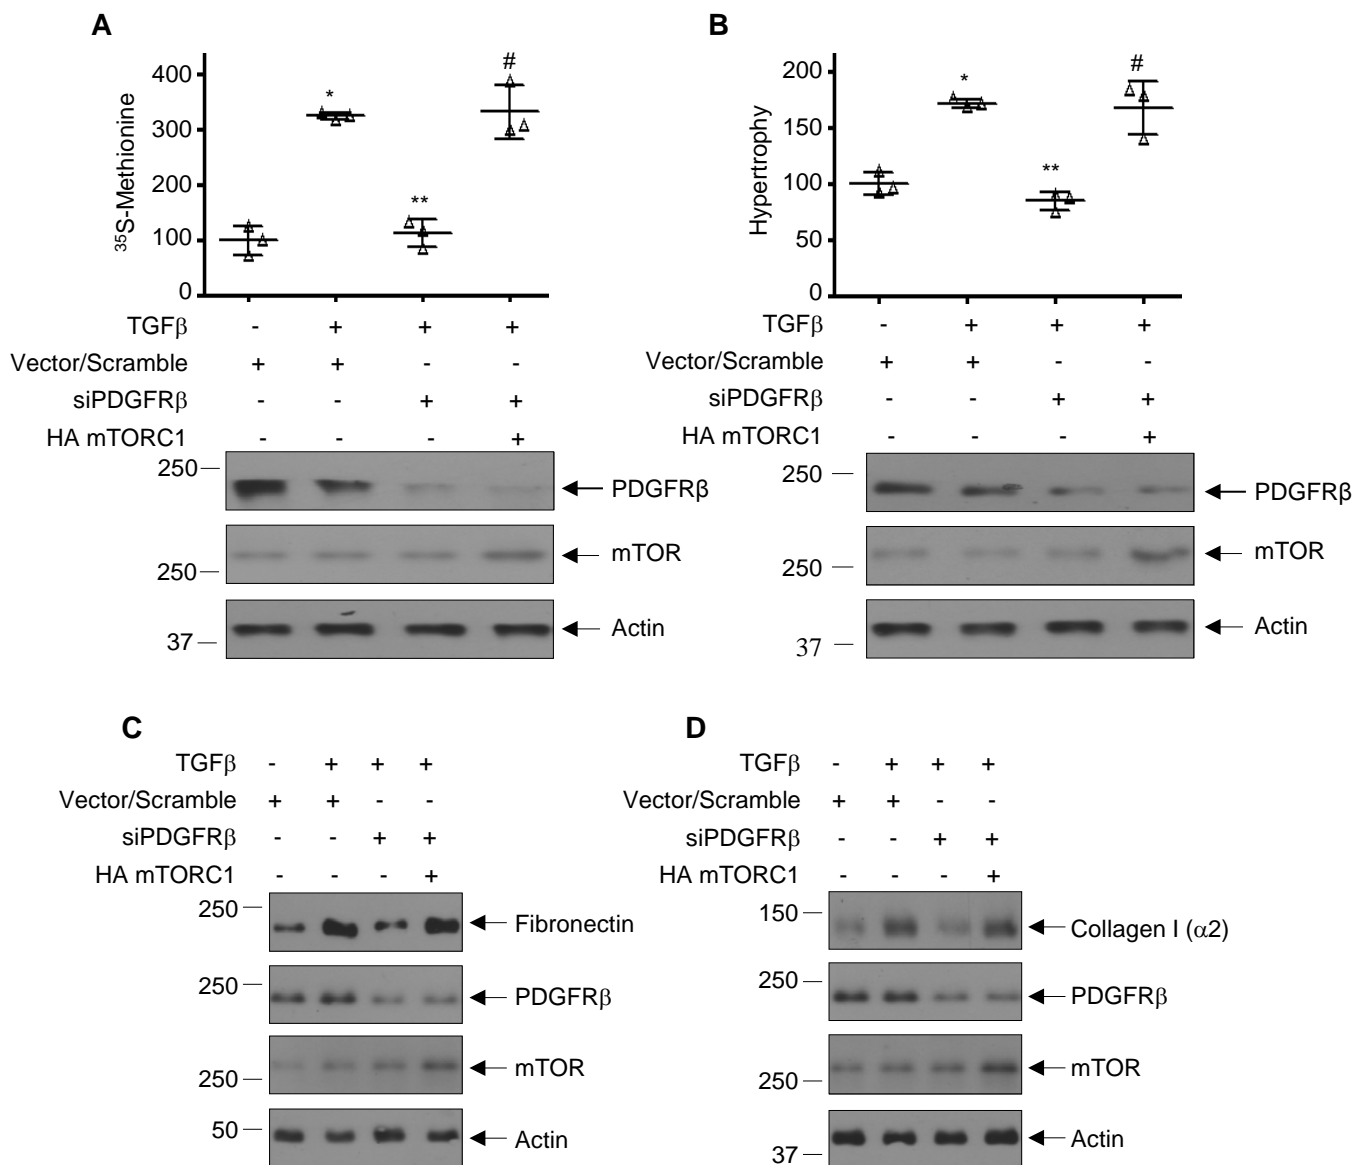

**Figure S6.** PDGFR $\beta$ -stimulated mTORC1 regulates TGF $\beta$ -induced mesangial cell pathology. Mesangial cells were transfected with siRNAs against PDGFR $\beta$  or scrambled RNA along with hyperactive (HA) mTOR mutant conferring mTORC1 activity as indicated. Transfected cells were incubated with 2 ng/ml TGF $\beta$ . In panels A and B, respectively, protein synthesis and hypertrophy of mesangial cells were measured as described in the experimental procedures. Mean  $\pm$  SD of triplicate measurements is shown. \* $p < 0.0001$  vs control; \*\* $p < 0.0001$  vs TGF $\beta$ ; # $p < 0.0001$  vs TGF $\beta$  + siPDGFR $\beta$ . In panels C and D, the cleared cell lysates were immunoblotted with indicated antibodies.

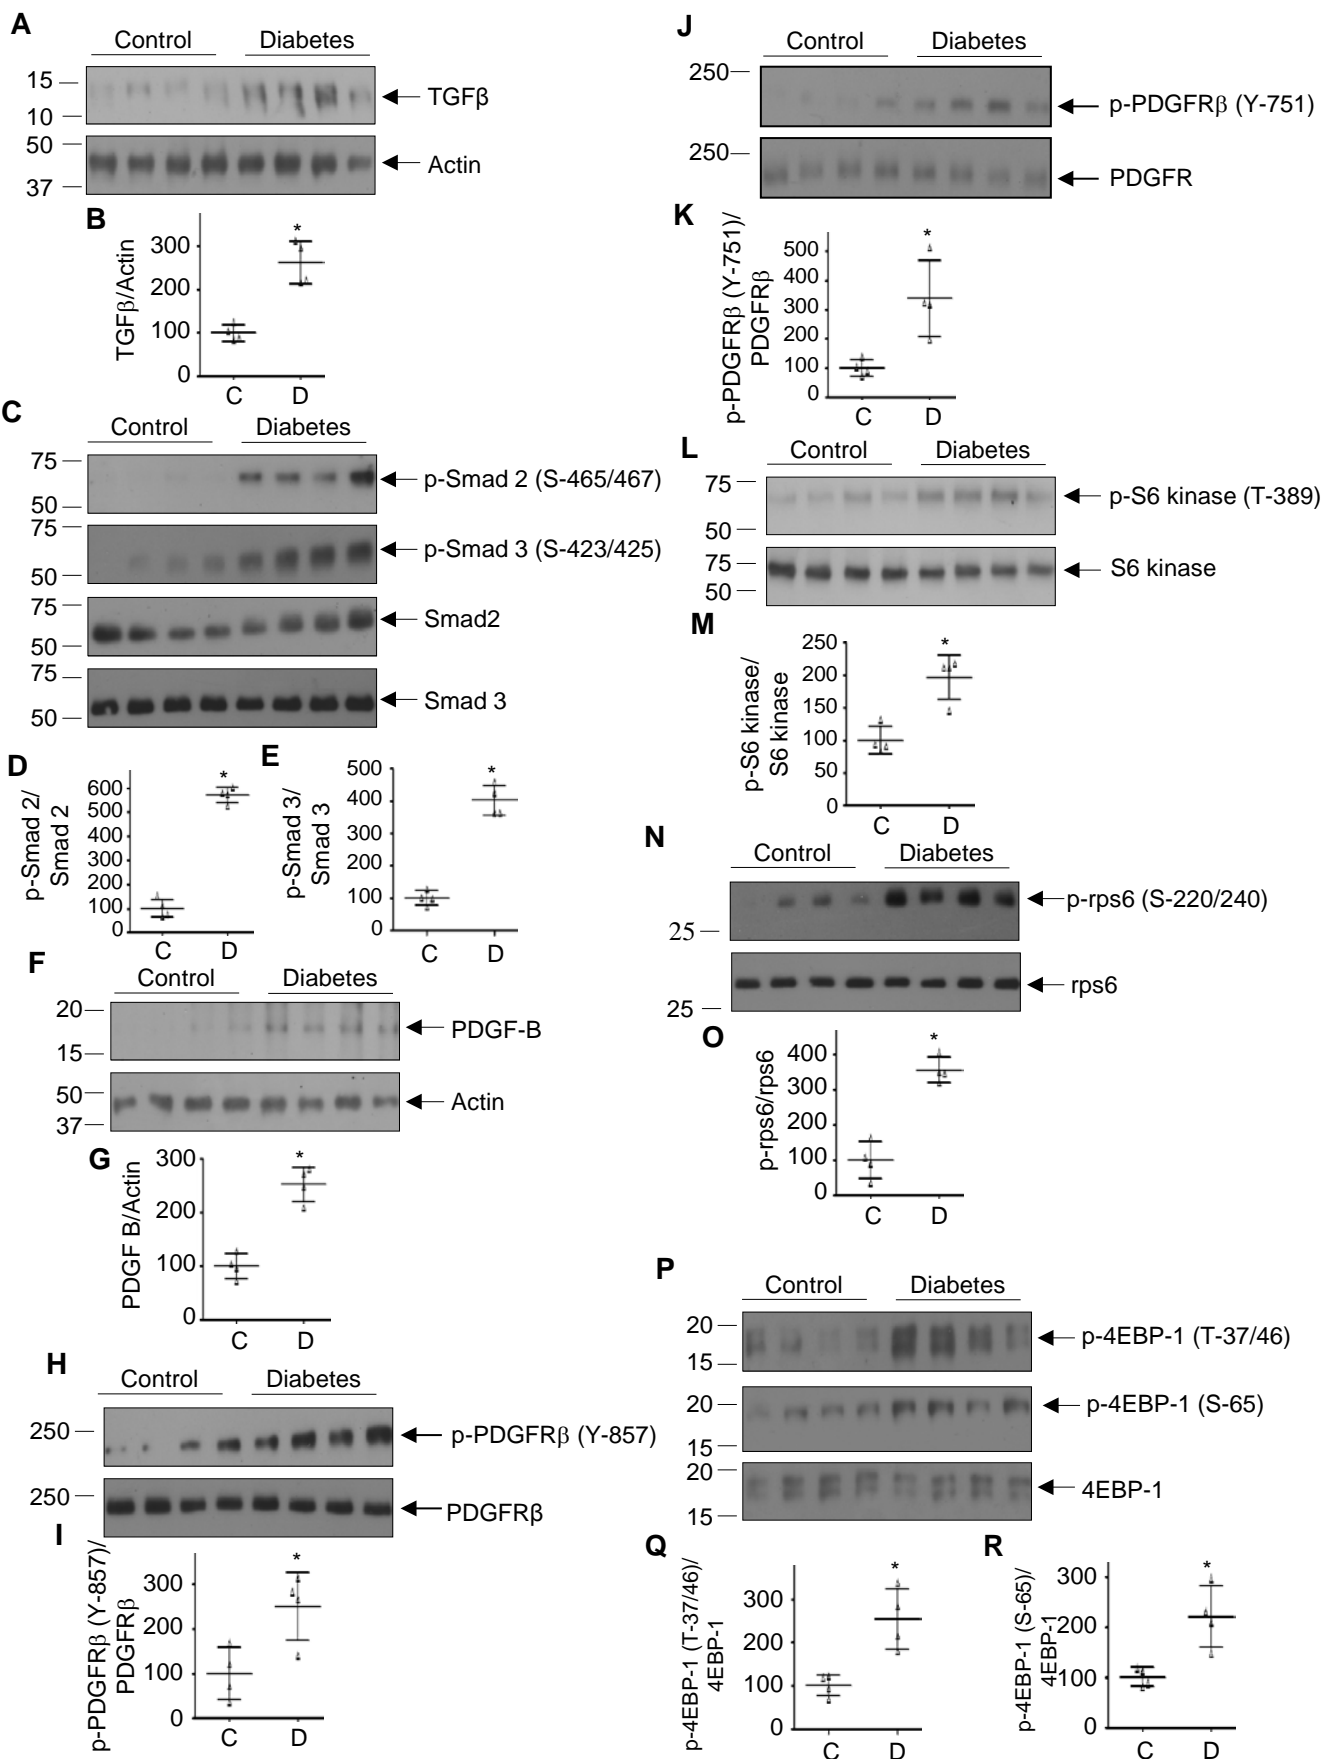

**Figure S7.** Increased level of TGFβ is associated with activation of PDGFRβ and mTORC1 signaling in STZ diabetic rat glomeruli. Renal glomerular lysates from control and STZ-induced diabetic rats were immunoblotted with indicated antibodies. Bottom panels in each blot represent quantification of protein bands. Mean ± SD of 4 animals is shown. \**p* < 0.0007 – 0.03 vs control animals.
